# Supplementary material for: Water-based synthesis of photocrosslinked hyaluronic acid/polyvinyl alcohol membranes via electrospinning
Source: Royal Society of Chemistry journal article supplement (doi:10.1039/d0ra04950f), 2020-01-01
Supplement: d0ra04950f1.pdf [file d0ra04950f1.pdf]

## Viscosity test

Viscosity was measured in a Haake RheoStress 1 rheometer at 25°C (spindle 2: HA solution and, spindle 34: PVA solution).

Table 1 – Viscosity of the individual solutions of each polymer.

|               | Viscosity (cP) |             |
|---------------|----------------|-------------|
|               | PVA            | HA          |
| <b>0% AM</b>  | 161.4 ± 0.1    | 941.3 ± 0.1 |
| <b>5% AM</b>  | 166.2 ± 0.7    | 905 ± 2     |
| <b>15% AM</b> | 165.4 ± 0.1    | 1706 ± 2    |
| <b>30% AM</b> | 165.7 ± 0.1    | -*          |

\* Could not get the measure

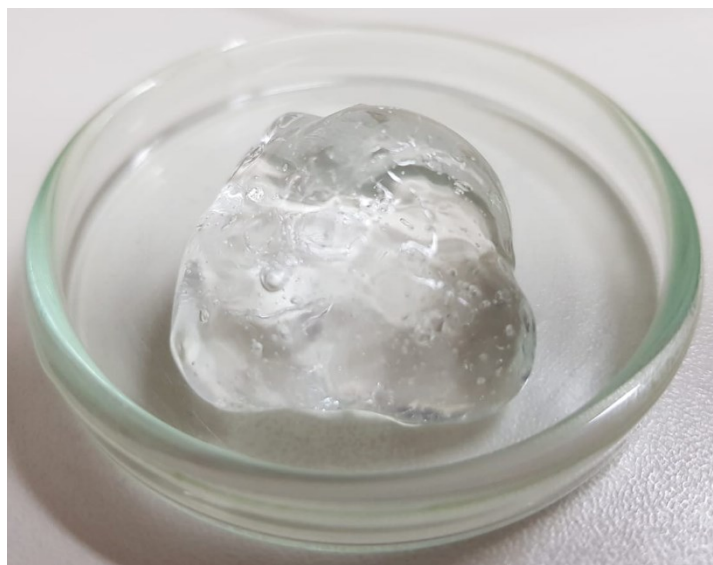

Figure 1 – Gelation of HA solution with addition of 30% MA
